# Supplementary material
Source: MDPI journal article supplement (https://www.mdpi.com/2036-7449/13/1/2)
Supplement: s1 [file s1]

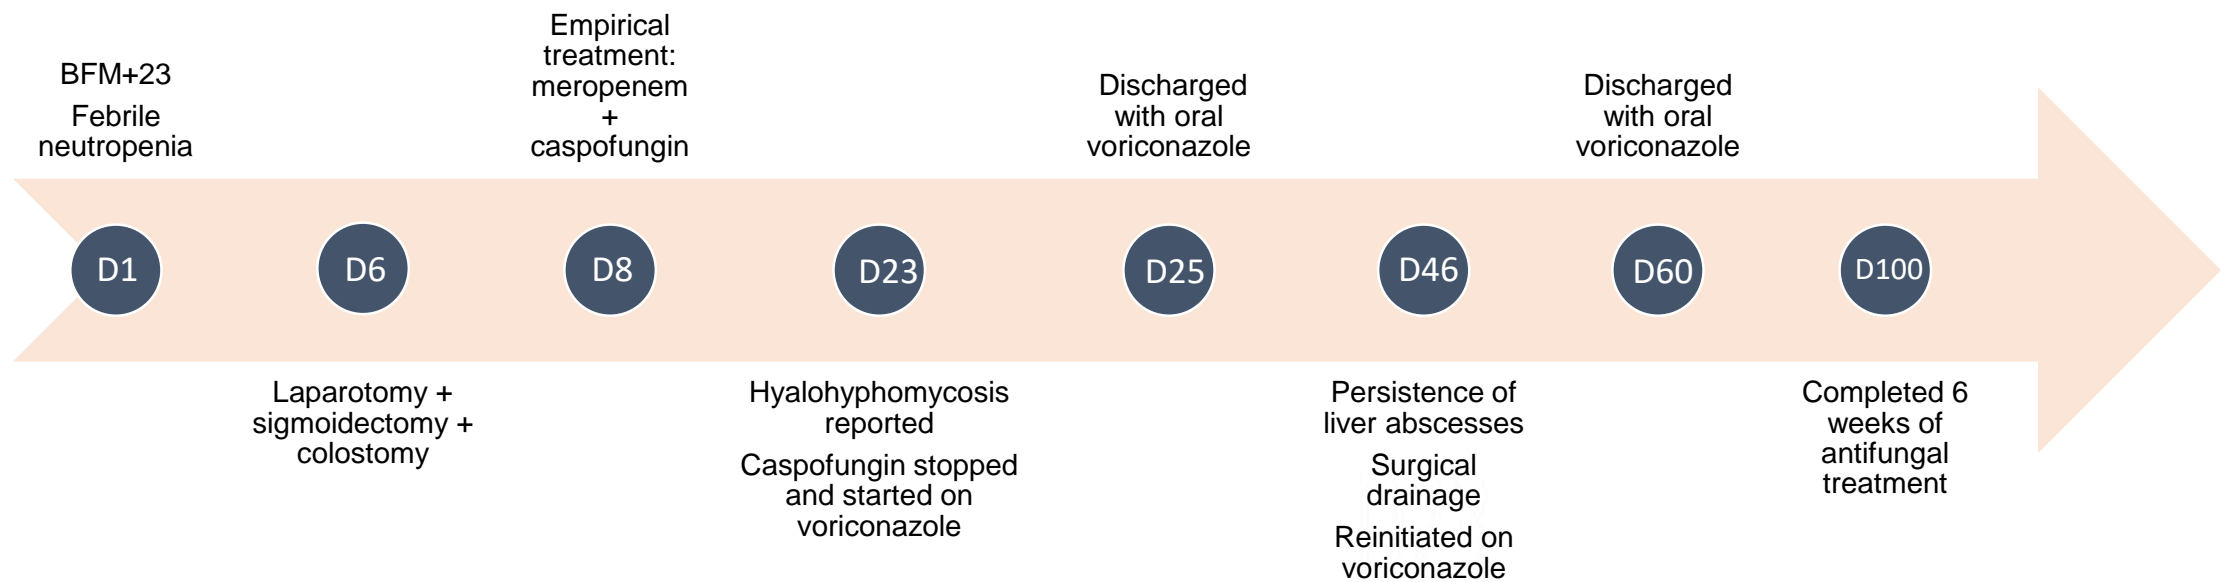

Figure S1: Timeline of patient's treatment from day 1 (D1) to day 100 (D100).  
BFM: BFM like protocol (L-asparaginase, vincristine, daunorubicin and prednisone)
